# Supplementary material
Source: PubMed Central journal article supplement (PMC3608816)
Supplement: NIHMS431824-supplement-02.pdf [file NIHMS431824-supplement-02.pdf]

## Supplemental Figure 2

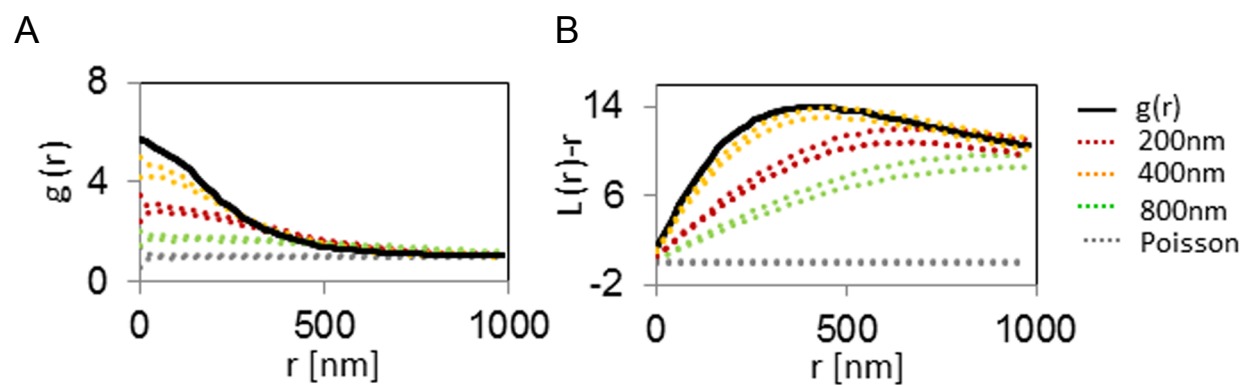

**C**

| Window radius size [nm] | Maximal distance of significant clustering, $g(r)$ [nm] | Maximal distance of significant clustering, $L(r)-r$ [nm] |
|-------------------------|---------------------------------------------------------|-----------------------------------------------------------|
| None (Poisson process)  | > 1000                                                  | >> 1000                                                   |
| 800                     | 440                                                     | > 1000                                                    |
| 400                     | 320                                                     | 760                                                       |
| 200                     | 260                                                     | 480                                                       |
