# Supplementary material
Source: PubMed Central journal article supplement (PMC3608816)

# Supplemental Figure 1

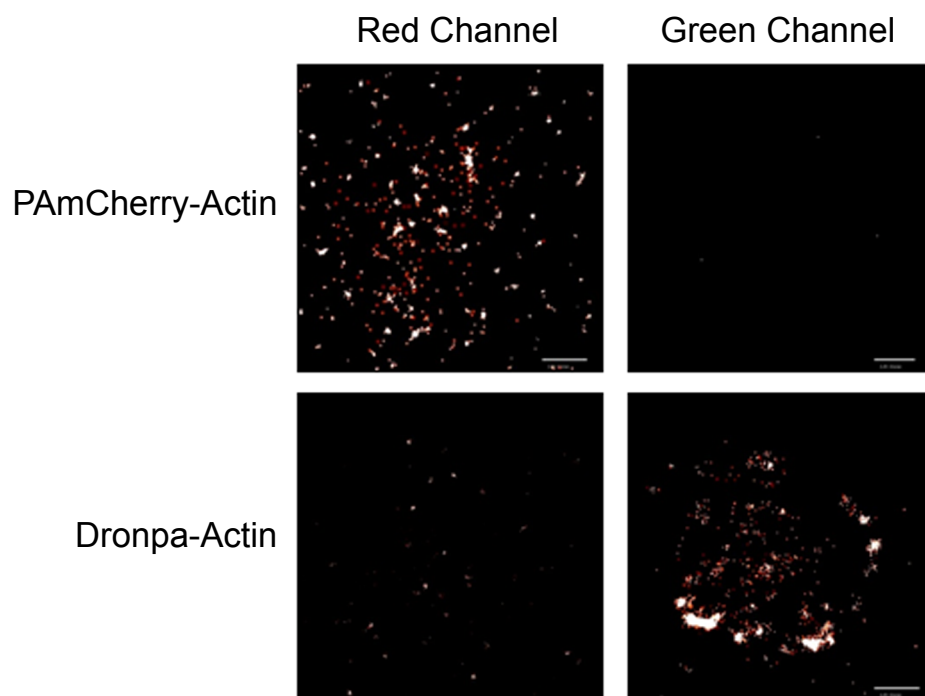

Supplement: NIHMS431824-supplement-01.pdf [file NIHMS431824-supplement-01.pdf]
